# Supplementary material
Source: publisher site journal article supplement (https://www.spandidos-publications.com/5283/downloadSupplementary)
Supplement: Supplementary file 1 [file downloadSupplementary]

## Sheet: liver cancer-miRNA
Table SIV. Screening of 77 liver cancer-associated miRNAs.
miRNA	Disease	Method	Year	Reference
hsa-let-7d	Hepatocellular carcinoma	Microarray	2007	Cyclin G1 is a target of miR-122a, a microRNA frequently down-regulated in human hepatocellular carcinoma.
hsa-let-7e	Hepatocellular carcinoma	Microarray	2007	Cyclin G1 is a target of miR-122a, a microRNA frequently down-regulated in human hepatocellular carcinoma.
hsa-let-7g	Hepatocellular carcinoma	Northern blot, RT-qPCR, etc	2008	Identification of metastasis-related microRNAs in hepatocellular carcinoma.
hsa-let-7g	Hepatocellular carcinoma	Microarray	2007	Cyclin G1 is a target of miR-122a, a microRNA frequently down-regulated in human hepatocellular carcinoma.
hsa-miR-1	Hepatocellular carcinoma	Northern blot, RT-qPCR, etc	2008	Methylation mediated silencing of MicroRNA-1 gene and its role in hepatocellular carcinogenesis.
hsa-miR-107	Hepatocellular carcinoma	Microarray	2009	Bead-based microarray analysis of microRNA expression in hepatocellular carcinoma: miR-338 is downregulated.
hsa-miR-1-2	Hepatocellular carcinoma	Northern blot, RT-qPCR, etc	2008	Identification of metastasis-related microRNAs in hepatocellular carcinoma.
hsa-miR-122	Hepatocellular carcinoma	Northern blot, RT-qPCR, etc	2009	Loss of miR-122 expression in liver cancer correlates with suppression of the
hsa-miR-122	Hepatocellular carcinoma	Northern blot, RT-qPCR, etc	2009	Role of microRNA-155 at early stages of hepatocarcinogenesis induced by choline-deficient and amino acid-defined diet in C57BL/6 mice.
hsa-miR-122	Hepatocellular carcinoma	Northern blot, RT-qPCR, etc	2009	MicroRNA-122 inhibits tumorigenic properties of hepatocellular carcinoma cells and sensitizes these cells to Sorafenib
hsa-miR-122a	Hepatocellular carcinoma	Northern blot, RT-qPCR, etc	2009	MiR-122/cyclin G1 interaction modulates p53 activity and affects doxorubicin sensitivity of human hepatocarcinoma cells.
hsa-miR-122a	Hepatocellular carcinoma	Northern blot, RT-qPCR, etc	2008	Identification of metastasis-related microRNAs in hepatocellular carcinoma.
hsa-miR-122a	Hepatocellular carcinoma	Northern blot, RT-qPCR, etc	2007	Cyclin G1 is a target of miR-122a, a microRNA frequently down-regulated in human hepatocellular carcinoma.
hsa-miR-122a	Hepatocellular carcinoma	Northern blot, RT-qPCR, etc	2005	Real-time expression profiling of microRNA precursors in human cancer cell lines.
hsa-miR-122a	Hepatocellular carcinoma	Northern blot, RT-qPCR, etc	2006	Downregulation of miR-122 in the rodent and human hepatocellular carcinomas.
hsa-miR-122a	Hepatocellular carcinoma	Microarray	2008	MicroRNA-223 is commonly repressed in hepatocellular carcinoma and potentiates expression of Stathmin1.
hsa-miR-122a	Hepatocellular carcinoma	Microarray	2009	Bead-based microarray analysis of microRNA expression in hepatocellular carcinoma: miR-338 is downregulated.
hsa-miR-124	Hepatocellular carcinoma	Northern blot, RT-qPCR, etc	2009	miR-124 and miR-203 are epigenetically silenced tumor-suppressive microRNAs in hepatocellular carcinoma
hsa-miR-124a	Hepatocellular carcinoma	Microarray	2009	Bead-based microarray analysis of microRNA expression in hepatocellular carcinoma: miR-338 is downregulated.
hsa-miR-125a	Hepatocellular carcinoma	Northern blot, RT-qPCR, etc	2006	Comprehensive analysis of microRNA expression patterns in hepatocellular carcinoma and non-tumorous tissues.
hsa-miR-125a	Hepatocellular carcinoma	Microarray	2009	Bead-based microarray analysis of microRNA expression in hepatocellular carcinoma: miR-338 is downregulated.
hsa-miR-125b	Hepatocellular carcinoma	Microarray	2009	Bead-based microarray analysis of microRNA expression in hepatocellular carcinoma: miR-338 is downregulated.
hsa-miR-125b-1	Hepatocellular carcinoma	Microarray	2006	Downregulation of miR-122 in the rodent and human hepatocellular carcinomas.
hsa-miR-125b-2	Hepatocellular carcinoma	Microarray	2006	Downregulation of miR-122 in the rodent and human hepatocellular carcinomas.
hsa-miR-126	Hepatocellular carcinoma	Northern blot, RT-qPCR, etc	2008	Identification of metastasis-related microRNAs in hepatocellular carcinoma.
hsa-miR-126	Hepatocellular carcinoma	Microarray	2009	Bead-based microarray analysis of microRNA expression in hepatocellular carcinoma: miR-338 is downregulated.
hsa-miR-126*	Hepatocellular carcinoma	Microarray	2009	Bead-based microarray analysis of microRNA expression in hepatocellular carcinoma: miR-338 is downregulated.
hsa-miR-128b	Hepatocellular carcinoma	Microarray	2009	Bead-based microarray analysis of microRNA expression in hepatocellular carcinoma: miR-338 is downregulated.
hsa-miR-129	Hepatocellular carcinoma	Microarray	2009	Bead-based microarray analysis of microRNA expression in hepatocellular carcinoma: miR-338 is downregulated.
hsa-miR-130a	Hepatocellular carcinoma	Microarray	2009	Bead-based microarray analysis of microRNA expression in hepatocellular carcinoma: miR-338 is downregulated.
hsa-miR-130a-1	Hepatocellular carcinoma	Microarray	2006	Downregulation of miR-122 in the rodent and human hepatocellular carcinomas.
hsa-miR-130b-1	Hepatocellular carcinoma	Microarray	2006	Downregulation of miR-122 in the rodent and human hepatocellular carcinomas.
hsa-miR-136	Hepatocellular carcinoma	Microarray	2007	Cyclin G1 is a target of miR-122a, a microRNA frequently down-regulated in human hepatocellular carcinoma.
hsa-miR-143	Hepatocellular carcinoma	Microarray	2009	Bead-based microarray analysis of microRNA expression in hepatocellular carcinoma: miR-338 is downregulated.
hsa-miR-143	Hepatocellular carcinoma	Northern blot, RT-qPCR, etc	2009	Up-regulated microRNA-143 transcribed by nuclear factor kappa B enhances hepatocarcinoma metastasis by repressing fibronectin expression.
hsa-miR-145	Hepatocellular carcinoma	Microarray	2009	Bead-based microarray analysis of microRNA expression in hepatocellular carcinoma: miR-338 is downregulated.
hsa-miR-146a	Hepatocellular carcinoma	Microarray	2007	Cyclin G1 is a target of miR-122a, a microRNA frequently down-regulated in human hepatocellular carcinoma.
hsa-miR-148a	Hepatocellular carcinoma	Northern blot, RT-qPCR, etc	2008	Identification of metastasis-related microRNAs in hepatocellular carcinoma.
hsa-miR-151	Hepatocellular carcinoma	Microarray	2008	Profiling microRNA expression in hepatocellular carcinoma reveals microRNA-224 up-regulation and apoptosis inhibitor-5 as a microRNA-224-specific target.
hsa-miR-152	Hepatocellular carcinoma	Microarray	2009	Bead-based microarray analysis of microRNA expression in hepatocellular carcinoma: miR-338 is downregulated.
hsa-miR-155	Hepatocellular carcinoma	Northern blot, RT-qPCR, etc	2009	Role of microRNA-155 at early stages of hepatocarcinogenesis induced by choline-deficient and amino acid-defined diet in C57BL/6 mice.
hsa-miR-15a	Hepatocellular carcinoma	Microarray	2009	Bead-based microarray analysis of microRNA expression in hepatocellular carcinoma: miR-338 is downregulated.
hsa-miR-16	Hepatocellular carcinoma	Microarray	2009	Bead-based microarray analysis of microRNA expression in hepatocellular carcinoma: miR-338 is downregulated.
hsa-miR-172a-2	Hepatocellular carcinoma	Microarray	2006	Downregulation of miR-122 in the rodent and human hepatocellular carcinomas.
hsa-miR-17-3p	Hepatocellular carcinoma	Microarray	2006	Downregulation of miR-122 in the rodent and human hepatocellular carcinomas.
hsa-miR-17-5p	Hepatocellular carcinoma	Microarray	2009	Bead-based microarray analysis of microRNA expression in hepatocellular carcinoma: miR-338 is downregulated.
hsa-miR-17-5p	Hepatocellular carcinoma	Microarray	2006	Downregulation of miR-122 in the rodent and human hepatocellular carcinomas.
hsa-miR-18	Hepatocellular carcinoma	Microarray	2009	Role of the miR-106b-25 microRNA cluster in hepatocellular carcinoma.
hsa-miR-181a-1	Hepatocellular carcinoma	Northern blot, RT-qPCR, etc	2009	Identification of microRNA-181 by genome-wide screening as a critical player in EpCAM-positive hepatic cancer stem cells.
hsa-miR-181a-2	Hepatocellular carcinoma	Northern blot, RT-qPCR, etc	2009	Identification of microRNA-181 by genome-wide screening as a critical player in EpCAM-positive hepatic cancer stem cells.
hsa-miR-181b-1	Hepatocellular carcinoma	Northern blot, RT-qPCR, etc	2009	Identification of microRNA-181 by genome-wide screening as a critical player in EpCAM-positive hepatic cancer stem cells.
hsa-miR-181b-2	Hepatocellular carcinoma	Northern blot, RT-qPCR, etc	2009	Identification of microRNA-181 by genome-wide screening as a critical player in EpCAM-positive hepatic cancer stem cells.
hsa-miR-181c	Hepatocellular carcinoma	Northern blot, RT-qPCR, etc	2009	Identification of microRNA-181 by genome-wide screening as a critical player in EpCAM-positive hepatic cancer stem cells.
hsa-miR-185	Hepatocellular carcinoma	Northern blot, RT-qPCR, etc	2008	Identification of metastasis-related microRNAs in hepatocellular carcinoma.
hsa-miR-185	Hepatocellular carcinoma	Microarray	2009	Bead-based microarray analysis of microRNA expression in hepatocellular carcinoma: miR-338 is downregulated.
hsa-miR-186	Hepatocellular carcinoma	Microarray	2008	Profiling microRNA expression in hepatocellular carcinoma reveals microRNA-224 up-regulation and apoptosis inhibitor-5 as a microRNA-224-specific target.
hsa-miR-192-2	Hepatocellular carcinoma	Microarray	2006	Downregulation of miR-122 in the rodent and human hepatocellular carcinomas.
hsa-miR-194	Hepatocellular carcinoma	Microarray	2009	Bead-based microarray analysis of microRNA expression in hepatocellular carcinoma: miR-338 is downregulated.
hsa-miR-194	Hepatocellular carcinoma	Northern blot, RT-qPCR, etc	2008	Identification of metastasis-related microRNAs in hepatocellular carcinoma.
hsa-miR-195	Hepatocellular carcinoma	Northern blot, RT-qPCR, etc	2009	MicroRNA-195 suppresses tumorigenicity and regulates G(1)/S transition of human hepatocellular carcinoma cells.
hsa-miR-195	Hepatocellular carcinoma	Microarray	2009	Bead-based microarray analysis of microRNA expression in hepatocellular carcinoma: miR-338 is downregulated.
hsa-miR-195	Hepatocellular carcinoma	Northern blot, RT-qPCR, etc	2006	Comprehensive analysis of microRNA expression patterns in hepatocellular carcinoma and non-tumorous tissues.
hsa-miR-195	Hepatocellular carcinoma	Microarray	2007	Cyclin G1 is a target of miR-122a, a microRNA frequently down-regulated in human hepatocellular carcinoma.
hsa-miR-199a	Hepatocellular carcinoma	Microarray	2009	Bead-based microarray analysis of microRNA expression in hepatocellular carcinoma: miR-338 is downregulated.
hsa-miR-19a	Hepatocellular carcinoma	Northern blot, RT-qPCR, etc	2008	Identification of metastasis-related microRNAs in hepatocellular carcinoma.
hsa-miR-200a	Hepatocellular carcinoma	Northern blot, RT-qPCR, etc	2006	Comprehensive analysis of microRNA expression patterns in hepatocellular carcinoma and non-tumorous tissues.
hsa-miR-200a	Hepatocellular carcinoma	Microarray	2009	Bead-based microarray analysis of microRNA expression in hepatocellular carcinoma: miR-338 is downregulated.
hsa-miR-200b	Hepatocellular carcinoma	Northern blot, RT-qPCR, etc	2008	Down-regulation of the microRNAs miR-34a, miR-127, and miR-200b in rat liver during hepatocarcinogenesis induced by a methyl-deficient diet.
hsa-miR-200b	Hepatocellular carcinoma	Microarray	2007	Cyclin G1 is a target of miR-122a, a microRNA frequently down-regulated in human hepatocellular carcinoma.
hsa-miR-203	Hepatocellular carcinoma	Northern blot, RT-qPCR, etc	2009	miR-124 and miR-203 are epigenetically silenced tumor-suppressive microRNAs in hepatocellular carcinoma
hsa-miR-205	Hepatocellular carcinoma	Microarray	2009	Bead-based microarray analysis of microRNA expression in hepatocellular carcinoma: miR-338 is downregulated.
hsa-miR-207	Hepatocellular carcinoma	Microarray	2009	Bead-based microarray analysis of microRNA expression in hepatocellular carcinoma: miR-338 is downregulated.
hsa-miR-20a	Hepatocellular carcinoma	Northern blot, RT-qPCR, etc	2008	Elevated expression of the miR-17-92 polycistron and miR-21 in hepadnavirus-associated hepatocellular carcinoma contributes to the malignant phenotype.
hsa-miR-21	Hepatocellular carcinoma	Northern blot, RT-qPCR, etc	2009	Role of microRNA-155 at early stages of hepatocarcinogenesis induced by choline-deficient and amino acid-defined diet in C57BL/6 mice.
hsa-miR-21	Hepatocellular carcinoma	Northern blot, RT-qPCR, etc	2009	Low-level expression of microRNAs let-7d and miR-205 are prognostic markers of head and neck squamous cell carcinoma.
hsa-miR-221	Hepatocellular carcinoma	Northern blot, RT-qPCR, etc	2009	Role of microRNA-155 at early stages of hepatocarcinogenesis induced by choline-deficient and amino acid-defined diet in C57BL/6 mice.
hsa-miR-221	Hepatocellular carcinoma	Northern blot, RT-qPCR, etc	2009	MicroRNA-221 targets Bmf in hepatocellular carcinoma and correlates with tumor multifocality.
hsa-miR-221	Hepatocellular carcinoma	Microarray	2009	Bead-based microarray analysis of microRNA expression in hepatocellular carcinoma: miR-338 is downregulated.
hsa-miR-222	Hepatocellular carcinoma	Northern blot, RT-qPCR, etc	2009	Role of microRNA-155 at early stages of hepatocarcinogenesis induced by choline-deficient and amino acid-defined diet in C57BL/6 mice.
hsa-miR-222	Hepatocellular carcinoma	Microarray	2008	Profiling microRNA expression in hepatocellular carcinoma reveals microRNA-224 up-regulation and apoptosis inhibitor-5 as a microRNA-224-specific target.
hsa-miR-222	Hepatocellular carcinoma	Microarray	2008	MicroRNA-223 is commonly repressed in hepatocellular carcinoma and potentiates expression of Stathmin1.
hsa-miR-222	Hepatocellular carcinoma	Microarray	2009	Bead-based microarray analysis of microRNA expression in hepatocellular carcinoma: miR-338 is downregulated.
hsa-miR-224	Hepatocellular carcinoma	Microarray	2009	Bead-based microarray analysis of microRNA expression in hepatocellular carcinoma: miR-338 is downregulated.
hsa-miR-23b	Hepatocellular carcinoma	Northern blot, RT-qPCR, etc	2009	MicroRNA-23b mediates urokinase and c-met downmodulation and a decreased migration of human hepatocellular carcinoma cells.
hsa-miR-24	Hepatocellular carcinoma	Microarray	2009	Bead-based microarray analysis of microRNA expression in hepatocellular carcinoma: miR-338 is downregulated.
hsa-miR-24-2	Hepatocellular carcinoma	Northern blot, RT-qPCR, etc	2008	Upregulation of miR-23a approximately 27a approximately 24 decreases transforming growth factor-beta-induced tumor-suppressive activities in human hepatocellular carcinoma cells.
hsa-miR-25	Hepatocellular carcinoma	Northern blot, RT-qPCR, etc	2009	Role of the miR-106b-25 microRNA cluster in hepatocellular carcinoma.
hsa-miR-25	Hepatocellular carcinoma	Microarray	2009	Bead-based microarray analysis of microRNA expression in hepatocellular carcinoma: miR-338 is downregulated.
hsa-miR-26a	Hepatocellular carcinoma	Northern blot, RT-qPCR, etc	2009	MicroRNA expression, survival, and response to interferon in liver cancer
hsa-miR-26a	Hepatocellular carcinoma	Northern blot, RT-qPCR, etc	2009	Therapeutic microRNA delivery suppresses tumorigenesis in a murine liver cancer model.
hsa-miR-26a-1	Hepatocellular carcinoma	Microarray	2006	Downregulation of miR-122 in the rodent and human hepatocellular carcinomas.
hsa-miR-26a-2	Hepatocellular carcinoma	Microarray	2006	Downregulation of miR-122 in the rodent and human hepatocellular carcinomas.
hsa-miR-26b	Hepatocellular carcinoma	Northern blot, RT-qPCR, etc	2009	MicroRNA expression, survival, and response to interferon in liver cancer
hsa-miR-27a	Hepatocellular carcinoma	Microarray	2009	Bead-based microarray analysis of microRNA expression in hepatocellular carcinoma: miR-338 is downregulated.
hsa-miR-27a	Hepatocellular carcinoma	Northern blot, RT-qPCR, etc	2008	Upregulation of miR-23a approximately 27a approximately 24 decreases transforming growth factor-beta-induced tumor-suppressive activities in human hepatocellular carcinoma cells.
hsa-miR-30a	Hepatocellular carcinoma	Northern blot, RT-qPCR, etc	2008	Identification of metastasis-related microRNAs in hepatocellular carcinoma.
hsa-miR-30c-1	Hepatocellular carcinoma	Northern blot, RT-qPCR, etc	2008	Identification of metastasis-related microRNAs in hepatocellular carcinoma.
hsa-miR-30e	Hepatocellular carcinoma	Northern blot, RT-qPCR, etc	2008	Identification of metastasis-related microRNAs in hepatocellular carcinoma.
hsa-miR-31	Hepatocellular carcinoma	Microarray	2008	MicroRNA-223 is commonly repressed in hepatocellular carcinoma and potentiates expression of Stathmin1.
hsa-miR-320-2	Hepatocellular carcinoma	Microarray	2006	Downregulation of miR-122 in the rodent and human hepatocellular carcinomas.
hsa-miR-324-5p	Hepatocellular carcinoma	Microarray	2008	Profiling microRNA expression in hepatocellular carcinoma reveals microRNA-224 up-regulation and apoptosis inhibitor-5 as a microRNA-224-specific target.
hsa-miR-338	Hepatocellular carcinoma	Northern blot, RT-qPCR, etc	2009	Bead-based microarray analysis of microRNA expression in hepatocellular carcinoma: miR-338 is downregulated.
hsa-miR-374	Hepatocellular carcinoma	Microarray	2008	Profiling microRNA expression in hepatocellular carcinoma reveals microRNA-224 up-regulation and apoptosis inhibitor-5 as a microRNA-224-specific target.
hsa-miR-500	Hepatocellular carcinoma	Northern blot, RT-qPCR, etc	2009	MicroRNA-500 as a potential diagnostic marker for hepatocellular carcinoma
hsa-miR-9	Hepatocellular carcinoma	Northern blot, RT-qPCR, etc	2009	MicroRNA-9 reduces cell invasion and E-cadherin secretion in SK-Hep-1 cell.
hsa-miR-93	Hepatocellular carcinoma	Northern blot, RT-qPCR, etc	2009	Role of the miR-106b-25 microRNA cluster in hepatocellular carcinoma.
miRNA, microRNA; RT-qPCR, reverse transcription-quantitative PCR.
